11 **SUMMARY**

12 Visual, auditory and somatosensory cortices are topographically organized, with neurons  
13 responding to similar sensory features clustering in adjacent portions of the cortex. Such  
14 topography has not been observed in the piriform cortex, whose responses to odorants are sparsely  
15 distributed across the cortex. The spatial organization of taste responses in the gustatory insular  
16 cortex (GC) is currently debated, with conflicting evidence from anesthetized rodents pointing to  
17 alternative and mutually exclusive models. Here, we rely on calcium imaging to determine how  
18 taste and task-related variables are represented in the superficial layers of GC of alert, licking mice.  
19 Our data show that the various stimuli evoke sparse responses from a combination of broadly and  
20 narrowly tuned neurons. Analysis of the distribution of responses over multiple spatial scales  
21 demonstrates that taste representations are distributed across the cortex, with no sign of spatial  
22 clustering or topography. Altogether, data presented here support the idea that the representation  
23 of taste qualities in GC of alert mice is sparse and distributed, analogous to the representation of  
24 odorants in piriform cortex.

25

26 **Keywords:** gustatory cortex, spatial representation, taste, two-photon imaging, widefield imaging

## 27 INTRODUCTION

28 In primary sensory cortices, the spatial representation of sensory information can be either  
29 segregated or distributed. Experiments in somatosensory, visual and auditory cortices  
30 demonstrated a globally ordered topographic map, in which neurons representing similar sensory  
31 features are clustered together [1-6]. In contrast, odorants in the rodent piriform cortex evoke  
32 distributed patterns of activity with no spatial clustering [7, 8].

33 The spatial representation of taste in the gustatory insular cortex (GC) has been debated  
34 over the years. Some evidence supports the existence of a “gustotopic” map [9-11], which features  
35 dedicated “hot spots” of narrowly tuned neurons exclusively responding to individual taste  
36 qualities. According to this model no taste coding occurs outside of these hotspots [11]. Other  
37 imaging studies, however, describe largely overlapping regions of GC that respond to multiple  
38 taste qualities and report the existence of broadly tuned neurons, hence challenging the existence  
39 of a strict topographic organization [12-14].

40 Regardless of the fundamental differences between imaging studies of GC, they all share  
41 a common caveat: they were performed in anesthetized rodents. Thus, even if a topographic  
42 organization of taste exists in GC of anesthetized rodents, it is unclear whether and how it would  
43 persist during wakefulness considering that sensory processing is significantly affected by the state  
44 of the animal [15, 16]. This study is designed to assess the spatial organization of taste-related  
45 information in awake, behaving animals.

46 GC is located deep in the ventrolateral portion of the forebrain, making its access  
47 challenging for direct optical imaging in awake behaving rodents. Thus, we relied on implanted  
48 microprisms [17] to monitor neural activity in awake behaving mice with two-photon and  
49 widefield calcium imaging. We trained mice to perform a cued-taste paradigm, in which subjects  
50 actively licked a spout for gustatory stimuli delivered after a go cue. Using two-photon calcium  
51 imaging, we found sparse representations of cue, licking and taste stimuli in the superficial layers  
52 of GC. We observed overlapping representations for these three signals. Of the taste-responsive  
53 neurons, some were narrowly tuned, responding to a single taste, while others were tuned more  
54 broadly. Within local fields of two-photon images (450 x 450  $\mu\text{m}$ ), taste-responsive neurons were  
55 not spatially clustered. To study the organization of taste responses in GC at a larger spatial scale,  
56 we applied a widefield imaging approach (2 x 1.6 mm field of view). Analysis of responses

57 confirmed that even at this large spatial scale, taste representations did not show any spatial  
58 clustering.

59           Altogether, data presented here support the idea that the representation of taste qualities in  
60 GC is sparse and distributed, analogous to the representation of odorants in piriform cortex.

## 61 RESULTS

### 62 Neural activity evoked by cue, licking and taste

63 Calcium imaging signals were obtained from the superficial layers of GC in 13 mice trained  
64 to perform a cued-taste paradigm (**Figure 1A**, see methods). Mice were first trained to lick a central  
65 spout following the offset a two second cue to obtain water, and then habituated for seven days to  
66 receive one out of five possible stimuli delivered pseudorandomly at each trial (sucrose [200 mM],  
67 NaCl [100 mM], citric acid [20 mM], quinine [1 mM] and water). After habituation, mice showed  
68 comparable duration of licking ( $n = 13$ , S:  $3.6 \pm 0.1$  s; N:  $3.5 \pm 0.2$  s; CA:  $3.5 \pm 0.2$  s; Q:  $3.5 \pm 0.1$   
69 s; W:  $3.5 \pm 0.1$  s; One-way ANOVA,  $F(4,60) = 0.07$ ,  $p = 0.99$ , **Figure 1B-C**) and no significant  
70 difference in inter-lick interval (One-way ANOVA,  $F(4,60) = 0.04$ ,  $p = 0.99$ ). This similarity in  
71 licking behaviors was acquired with habituation (on day 1, licking responses differed according to  
72 palatability – see methods).

73 To monitor calcium signals, we expressed the genetically encoded calcium indicator  
74 GCaMP6f [18] in GC (**Figure 2A**). To verify GCaMP6f expression in GC, in a subset of mice  
75 ( $n=3$ ) we also injected an anterograde tracer (AAV1-CB7-CI-TurboRFP) into the taste thalamus  
76 (ventral posteromedial parvocellularis, VPMpc). As seen in **Figure 2A**, turboRFP-positive  
77 thalamic fibers (magenta) were colocalized with the neurons expressing GCaMP6f (green) in GC  
78 (**Figure 2A**).

79 To directly monitor neural activity from the superficial layers of GC (**Figure 2B**), we used  
80 two-photon calcium imaging. This approach allowed us to simultaneously record 50-150 neurons  
81 from mice engaged in the task (**Supplementary video 1**). We applied a constrained non-negative  
82 matrix factorization (CNMF) algorithm [19] to automatically segment regions of interest (ROIs,  
83 putative cells), extract calcium traces and deconvolved activity of each cell (**Figure 2C**).  
84 Deconvolution allowed us to disambiguate responses to cue, licking initiation and tastants (**Figure**  
85 **2D**). In total, we recorded 1137 neurons from 10 mice (16 sessions). Consistent with previous  
86 studies [20-23], neurons in GC responded to all the events in the task: anticipatory cue, licking  
87 initiation and gustatory stimuli (**Figure 2E**). In total, we observed 9.9% (112/1137) of neurons  
88 responded to cue, 6.9% (79/1137) of neurons responded to licking initiation and 24.2% (275/1137)  
89 of neurons responded to the gustatory stimuli (**Figure 2F**). We also observed cells with  
90 overlapping responses, 24.1% (27/112) of cue-responsive and 77.2% (61/79) of lick-responsive

91 neurons also responded to gustatory stimuli. Overall, the responses to the cue, lick initiation and  
92 taste in the superficial layers of GC were sparse.

93 Next, we analyzed responses to each of the five stimuli. Taste-responsive neurons  
94 responded to S, N, CA, Q and W in the following proportions: S: 40.7% (112/275), N: 40.4%  
95 (111/275), CA: 37.1% (102/275), Q: 39.6% (109/275) and W: 43.6% (120/275) (**Figure 3A-B**).  
96 No significant difference was observed in the average evoked response to the five tastants (for  
97 evoked  $\Delta F/F$ , S:  $0.27 \pm 0.01$ , N:  $0.32 \pm 0.02$ , CA:  $0.28 \pm 0.02$ , Q:  $0.27 \pm 0.02$ , W:  $0.28 \pm 0.02$ , one-  
98 way ANOVA,  $F(4,549) = 1.41$ ,  $p = 0.23$ ; for evoked deconvolved activity, S:  $0.051 \pm 0.003$ , N:  
99  $0.053 \pm 0.003$ ; CA:  $0.051 \pm 0.003$ ; Q:  $0.047 \pm 0.003$ , W:  $0.051 \pm 0.003$ , one-way  
100 ANOVA,  $F(4,549) = 0.5$ ,  $p = 0.74$ , **Figure 3C**). The fraction of taste-responsive neurons with best  
101 responses to the five tastants was also comparable (S: 20.4% [56/275], N: 17.4% [48/275], CA:  
102 20.4% [56/275], Q: 19.6% [54/275], W: 22.2% [61/275], Pearson's  $\chi^2$  test,  $\chi^2_{(4)} = 2.0$ ,  $p = 0.74$ ,  
103 **Figure 3D**). Based on evoked responses, we observed both narrowly and broadly tuned neurons,  
104 47.6% (131/275) of neurons responded to only one tastant, 52.4% (144/275) responded to multiple  
105 tastants (**Figure 3E**). To further evaluate tuning, we applied a hierarchical clustering analysis to  
106 classify the taste responses. This analysis identified 16 clusters (**Figure 3F**). For each cluster, we  
107 calculated the entropy – a well-established measure for the breadth of tuning [24]. Five clusters  
108 had low entropy ( $0.019 \pm 0.01$ ), representing neurons (50.2% [138/275]) that were narrowly tuned  
109 to the five tastants. The other 11 clusters had high entropy ( $0.62 \pm 0.04$ ), representing neurons  
110 (49.8% [137/275]) broadly tuned to multiple tastants (**Figure 3G**). Thus, we found a range of both  
111 broadly and narrowly tuned taste-responsive cells in superficial layers of GC, consistent with  
112 previous imaging studies in anesthetized mice [13].

113

### 114 **Spatial representation of taste quality**

115 Visual inspection of taste responses suggests the absence of any spatial clustering of taste-  
116 responsive neurons for any of the five stimuli (S: sweet, N: salty, CA: sour, Q: bitter, W: water).  
117 **Figure 4A** shows a representative two-photon imaging field with neurons responding to the five  
118 stimuli. To quantify the spatial distribution of taste responses, for each stimulus we compared the  
119 pairwise distance between taste-responsive neurons with a null distribution (see method, **Figure**  
120 **4B**). We used a significance threshold of 0.05 to avoid an excessively stringent criterion for  
121 identifying clustering (see methods for results for the stricter 0.01 threshold). We observed that in

122 the majority of individual sessions (S:13/16 sessions, N: 15/16 sessions, CA: 15/16 sessions; Q:  
123 15/16 sessions; W: 14/16 sessions), the distance between taste-responsive neurons was not  
124 significantly smaller than the distance between randomly selected neurons, suggesting that there  
125 was no spatial clustering. In the instances with significant smaller pairwise distance between taste-  
126 responsive neurons ( $n = 5$  sessions), the average intra-cluster distance between neurons (see  
127 method, **Supplementary Figure 1B**) was not significantly different from inter-cluster distance,  
128 indicating neurons responding to each quality were still intermingled (**Supplementary Figure 1**).  
129 Furthermore, in these instances we observed that 54% (41/76) of taste responsive neurons were  
130 broadly tuned, a result incompatible the idea that these responses may represent some remnants of  
131 hot spots. In addition, we did not observe consistent spatial clustering for neurons responsive to  
132 the anticipatory cue and licking (**Supplementary Figure 2**).

133 One of the potential limitations of our two-photon approach is a field of view constrained  
134 to  $450 \times 450 \mu\text{m}$ . To evaluate the spatial organization of a larger portion of GC, we applied a  
135 widefield imaging approach, which provided a  $\sim 2 \times 1.6 \text{ mm}$  field of view with single-cell  
136 resolution (**Figure 5A, Supplementary Video 2**). We used a CNMF-E algorithm, an extension of  
137 the CNMF for one-photon imaging, to automatically extract the location of ROIs (putative cells),  
138 calcium traces and deconvolved activity for each cell (**Figure 5A**). In total, we recorded 3325  
139 putative neurons from 4 mice (including one mouse recorded with two-photon imaging before)  
140 with widefield imaging. The data confirmed the sparseness of responses to cue (6.32% [210/3325]),  
141 lick initiation (5.71% [190/3325]) and taste (18.59% [618/3325]), already observed with two-  
142 photon imaging. The prevalence of cue and taste responses observed with widefield imaging was  
143 significantly lower than that seen with two-photon imaging (cue responses: Pearson's  $\chi^2$  test,  $\chi^2_{(1)}$   
144 = 15.8,  $p < 0.001$ ; lick responses: Pearson's  $\chi^2$  test,  $\chi^2_{(1)} = 2.1$ ,  $p = 0.15$ ; taste responses: Pearson's  
145  $\chi^2$  test,  $\chi^2_{(1)} = 16.2$ ,  $p < 0.001$ ). This difference may be related to widefield imaging being able to  
146 resolve activity only from more superficial layers compared to two-photon.

147 To assess the spatial organization of taste qualities at this larger field of view, we first  
148 calculated the pairwise distance between neurons evoked by each of the five tastants (S, N, CA, Q,  
149 W) as described above. As for the two-photon analysis, also in this case we used a significance  
150 threshold of 0.05 (see methods for results with a more stringent, 0.01, threshold). **Figure 5B** shows  
151 an example of spatial locations of neurons responding to the five stimuli in one imaging field.  
152 Taste-evoked responses for each gustatory stimulus were not clustered or segregated, but instead

153 distributed across the field. Indeed, in the majority of imaging fields (S:3 of 4 sessions, N: 3 of 4  
154 sessions, CA: 3 of 4 sessions, Q: 4 of 4 sessions, W: 3 of 4 sessions), distance between taste-  
155 responsive neurons was not significantly smaller than the distance between randomly selected  
156 neurons, suggesting that even at a larger field of view, responses to taste in the superficial layer of  
157 GC are randomly distributed. In the session (n =1) with significantly smaller pairwise distance  
158 between taste-responsive neurons, 59% of the neurons (33/56) were broadly tuned and the intra-  
159 cluster distance was not significantly different from inter-cluster distance, indicating that neurons  
160 responding to each quality were still intermingled (**Supplementary Figure 3A-C**).

161 This distributed organization of taste responses can be related to the relatively large  
162 proportion of broadly tuned neurons and to the duplication of those neurons in the analysis for  
163 multiple tastants. To adopt a more stringent criterion, we re-calculated the distance between  
164 neurons focusing exclusively on the best response to each of five stimuli (**Figure 5C-5D**,  
165 **Supplementary Figure 3D-E**). Visual inspection of the spatial map of best responses (**Figure**  
166 **5C**), suggests that even in this scenario, responses to tastants were distributed. Indeed, in the  
167 majority of imaging fields (S:4 of 4 sessions, N: 3 of 4 sessions, CA: 4 of 4 sessions, Q: 4 of 4  
168 sessions, W: 4 of 4 sessions), distance between neurons with best responses to each tastant was  
169 not significantly smaller than the distance between randomly chosen neurons. **Figure 5E** shows  
170 the normalized intra-cluster distance of neurons with best response to the five gustatory stimuli in  
171 4 imaging sessions.

172 It has been previously reported that GC neurons anterior to the middle cerebral artery  
173 (MCA) respond more to sucrose and NaCl [11], and GC neurons posterior to MCA respond more  
174 to quinine [11, 25]. In our imaging dataset, we did not observe this trend. Indeed, a comparable  
175 proportion of GC neurons anterior to MCA responded to each of the 4 taste qualities (S: 22.8%  
176 [47/206], N: 20.9% [43/206], CA: 20.9% [43/206], Q: 17.5% [36/206], W: 18.0% [37/206],  
177 Pearson's  $\chi^2$  test,  $\chi^2_{(4)} = 2.57$ ,  $p = 0.63$ , **Figure 5F**). GC neurons posterior to MCA showed a similar  
178 tendency of responding to the 4 taste qualities (S: 20.0% [82/412], 25.0% [103/412], 18.2%  
179 [75/412], 16.8% [69/412], 20.2% [83/412]), with a slightly higher tendency of responding to NaCl  
180 compared to quinine (Pearson's  $\chi^2$  test with Bonferroni correction, adjusted  $p = 0.04$ ). Similar  
181 results were obtained when we focused exclusively on the amplitude of evoked best responses. No  
182 significant taste preference was found for neurons located anterior and posterior to MCA (anterior  
183 to MCA, evoked  $\Delta F/F$ , S:  $0.35 \pm 0.03$ , N:  $0.38 \pm 0.03$ , CA:  $0.35 \pm 0.03$ , Q:  $0.37 \pm 0.03$ , W:  $0.40 \pm$



184 0.04, One-way ANOVA,  $F(4,201) = 0.36$ ,  $p = 0.84$ ; posterior to MCA, evoked  $\Delta F/F$ , S:  $0.29 \pm$   
185  $0.02$ , N:  $0.29 \pm 0.02$ , CA:  $0.35 \pm 0.02$ , Q:  $0.33 \pm 0.02$ , W:  $0.33 \pm 0.02$ , One-way ANOVA,  $F(4,407)$   
186  $= 2.15$ ,  $p = 0.07$ , **Figure 5G**).

187 In summary, our data show that in the superficial layers of GC of alert mice, taste is  
188 represented through sparse and distributed patterns of activity.

## 189 **DISCUSSION**

190 This study evaluated the spatial representations of cue, licking, and taste qualities in the  
191 superficial layers of GC in awake behaving rodents. We trained mice in a cued-taste paradigm to  
192 lick a spout after an auditory cue to receive tastants. To monitor neural activity, we chronically  
193 implanted microprisms above the surface of GC and performed two-photon calcium imaging. We  
194 observed that the activity evoked by the cue, licking and all the gustatory stimuli was sparse.  
195 Analysis of taste-evoked responses showed a combination of narrowly and broadly tuned neurons.  
196 Taste representations were spatially distributed. To exclude that the lack of clusters was not related  
197 to the limited field of view of two-photon imaging (450 x 450  $\mu\text{m}$ ), we performed widefield  
198 imaging with cellular resolution over a 2 x 1.6 mm region of GC. Like with two-photon imaging,  
199 we found that GC neurons representing chemosensory information were largely scattered  
200 throughout the field and did not form isolated and selective clusters. These results support a  
201 spatially distributed coding scheme for taste-related information in the superficial layers of GC,  
202 analogous to the coding of odorants in the piriform cortex [7, 8].

203

### 204 **Multimodal responses in GC**

205 The role of GC in processing taste-related information has traditionally been studied with  
206 electrophysiological recordings. Unlike the electrophysiological approaches used in GC, imaging  
207 allows for monitoring of large neural ensembles while preserving spatial information. Here, we  
208 imaged neural activity in the superficial layers of GC using two-photon and widefield calcium  
209 imaging. Consistent with electrophysiological studies [20-23, 26], we observed GC responding to  
210 taste qualities, cue, and licking, with a mixture of narrowly and broadly tuned neurons. Neurons  
211 could either respond exclusively to a single modality or to multiple modalities (i.e., a convergent  
212 representation of cue, licking and taste qualities). This observation re-affirms that GC is  
213 multimodal, and capable of encoding non-chemosensory, taste-related variables.

214 Though largely consistent, the observed responses to taste qualities (19-25%), cue (6-10%),  
215 and licking (~5%) were relatively sparse compared with previous work [20, 27, 28]. This  
216 discrepancy could arise from several factors. First, our study only examined excitatory responses,  
217 inhibitory responses were not included due to the difficulty of analyzing them in imaging datasets.  
218 Inhibitory modulation has been observed in GC during active licking [27]. Thus, by excluding  
219 inhibitory responses, our study underestimates responsiveness to taste, cue and licking. Second,

220 our microprism-based imaging approach only allows for recording from neurons located in the  
221 superficial layers of GC, electrophysiological recordings generally sample from deeper layers. In  
222 sensory cortices, neurons in different layers can have varied tuning and response profiles, with  
223 some reports showing sparser representations of stimuli in superficial layers [29-31]. While our  
224 result is consistent with work on other sensory cortices, the representation of taste-related  
225 information across different layers of GC requires further study. Finally, the lower sensitivity of  
226 calcium imaging relative to single unit extracellular recordings may have played a role in  
227 underestimating neural responses.

228 In our dataset, the majority of GC neurons (60-70%) did not respond to taste, cue or licking.  
229 Neurons in GC have been shown to encode a broad range of cross-modal information, including  
230 olfactory, visual and somatosensory stimuli [20]. A subset of the non-responsive neurons may be  
231 involved in encoding this information and participate in the perception of flavor [32, 33] and the  
232 formation of associative representations triggered by anticipatory cues [20, 21, 26]. Moreover, GC  
233 neurons have been shown to encode cognitive variables associated with decision making [27, 34].  
234 Hence, a proportion of the non-responsive neurons may also participate in encoding cognitive  
235 variables associated with the task. Future imaging of GC will require the use of more complex  
236 tasks that involve learning and decision making.

237

### 238 **Spatial representation of taste quality in GC**

239 In sensory cortices, the spatial representation of sensory information can be either clustered  
240 or distributed. In primary somatosensory, visual and auditory cortices, neuronal responses are  
241 organized into a topographic map, with neurons encoding similar stimulus features, such as spatial  
242 proximity, orientation or frequency, clustering near each other [2, 3, 5, 6]. In contrast, the  
243 representation of olfactory information in rodent piriform cortex is sparse and distributed [7, 8].

244 In the past decade, several attempts have been made at applying optical imaging to study  
245 the spatial coding of taste quality in GC, and the results are discordant [11-14, 35]. Some studies  
246 describe spatial clusters tuned exclusively to individual stimuli with virtually no broadly tuned  
247 neurons inside or outside of the clusters [11]. Others find a combination of narrowly and broadly  
248 tuned neurons with no spatial clustering [13]. Regardless, all these studies have been conducted in  
249 anesthetized rodents. Sensory coding has been shown to be sensitive to anesthesia, thus it is unclear  
250 how these findings would extend to alert animals [15]. Here, we attempt to resolve some of these

251 controversies by recording taste responses in GC of awake, behaving rodents. Using two-photon  
252 and widefield calcium imaging, we observed both narrowly and broadly tuned taste-responsive  
253 neurons that are spatially distributed throughout the superficial layer of GC.

254 Our experiments relied on single concentrations of each gustatory stimulus and hence  
255 caution should be taken in generalizing our results to all stimulus intensities. It is theoretically  
256 possible that spatial clustering may emerge only for selected stimulus intensities [36]. However,  
257 the concentrations adopted for our experiments are consistent with those widely used in the field  
258 [28, 37, 38] and for three stimuli (sucrose, citric acid and NaCl), we chose the same concentrations  
259 used in the study that described a strict topographic organization. [11]. For quinine we relied on a  
260 lower concentration than the aforementioned study (1mM vs 10mM) because 10mM is highly  
261 aversive and not suitable for an active licking paradigm. It is unlikely that high stimulus intensity  
262 may lead to spatially localized responses, as studies in gustatory sensory ganglion neurons  
263 demonstrate that high stimulus intensities increase, instead of reducing, the breadth of tuning [37].

264 While stimulus intensity is unlikely to account for the discrepancy between our findings  
265 and those reported in Chen et al, fundamental differences in experimental design may have played  
266 a key role. First, we used GCaMP6f, a more sensitive calcium indicator than bulk-loaded dyes.  
267 Second, taste responses were recorded from awake, behaving mice rather than anesthetized  
268 animals. Third, the method of taste delivery differed dramatically. In our experiments, mice  
269 received 2 drops of tastants by actively licking. In Chen et al., tastants were perfused into the oral  
270 cavity for 10 s. These factors may account for our different observations.

271 It is worth emphasizing that our results are consistent with other studies using intrinsic and  
272 two-photon imaging in anesthetized rodents which showed that regions in GC responding to  
273 different tastes are largely overlapping [12-14].

274 The studies relying on two-photon imaging, like ours, covered relatively small fields of view (450  
275 x 450  $\mu\text{m}$ ). Thus, it could be argued that a spatial organization of taste responses might still exist  
276 on a larger scale, especially at the rostral and caudal extremes of GC. To address this concern, we  
277 performed widefield imaging with cellular resolution and imaged neural activity in GC at a large  
278 scale (2 x 1.6 mm). With this technique we still observed that responses evoked by taste qualities  
279 were distributed across the surface of GC. Even when we re-categorized neurons by their best  
280 responses – a procedure that could bias the analysis toward a topographic organization -  
281 representation of taste quality was spatially distributed.

282           Despite an overall distributed representation, there could still be a gradient of best  
283 responses in the anterior and posterior portions of GC. We separately looked at responses in  
284 regions anterior and posterior to the middle cerebral artery, a landmark that bisects GC, and still  
285 found little to no evidence for the spatial biasing of taste responses. These observations are  
286 consistent with electrophysiological studies in alert rodents showing that taste tuning does not  
287 depend on spatial location within GC [27, 28, 38]. Indeed, neurons in anterior or posterior GC  
288 show comparable tuning and tendency of responses to each taste quality [28].

289           Altogether, our data provide compelling evidence for a distributed organization of taste  
290 representations in GC, reminiscent of odorant coding in piriform cortex [7, 8]. This similarity  
291 suggests that chemo-sensation shares a distributed coding scheme differing from the topographical  
292 organization of visual, somatosensory and auditory systems.

293 **ACKNOWLEDGEMENTS:**

294 The authors would like to acknowledge Dr. Craig Evinger, Dr. Arianna Maffei, Dr. Joshua L.  
295 Plotkin, Dr. Daniel B. Polley, past and present members of the Fontanini and Maffei's laboratories  
296 at Stony Brook University for their feedback and insightful comments. This work has been  
297 supported by National Institute on Deafness and Other Communication Disorder Grants  
298 R01DC018227 and R21DC017681 to AF.

299

300 **AUTHOR CONTRIBUTION:**

301 K.C., and A.F. carried out study conceptualization and experimental design. K.C. and J.K.  
302 performed calcium imaging, behavioral experiments and data analysis. All the authors contributed  
303 to writing the manuscript.

304

305 **DECLARATION OF INTEREST:**

306 The authors declare that no competing interests exist.

307

## 308 MATERIAL AND METHODS

### 309 Experimental subjects

310 Adult male mice (C57BL/6J, 12-20 weeks old, The Jackson Laboratory) were used for this  
311 study. We used exclusively male mice to reduce the possible variability associated with estrous  
312 cycle. Mice were group housed and maintained on a 12 h light/dark cycle with *ad libitum* access  
313 to food and water unless otherwise specified. All experimental protocols were approved by the  
314 Institutional Animal Care and Use Committee at Stony Brook University, and complied with  
315 university, state, and federal regulations on the care and use of laboratory animals.

316

### 317 Surgical procedures for viral injection and prism implantation

318 Mice were anesthetized with an intraperitoneal injection of a mixture of dexmedetomidine  
319 (1 mg/kg) and ketamine (70 mg/kg). The depth of anesthesia was assessed by testing pinch reflex.  
320 Once fully anesthetized, mice were placed on a heating pad (DC temperature control system, FHC,  
321 Bowdoin, ME) to maintain the body temperature at 35 °C. The animal's head was shaved, cleaned,  
322 disinfected (three alternating washes of iodine and ethanol) and fixed to a surgical stereotaxic  
323 apparatus. Carprofen (5 mg/kg) was injected subcutaneously for analgesia. Ophthalmic ointment  
324 was placed on eyes to prevent dehydration. The scalp was carefully cut open and the skull was  
325 leveled. A small craniotomy was drilled on the dorsal portion of the skull above left GC (AP: 1.2  
326 mm, ML: 3.5-4.0 mm relative to bregma). A pulled glass pipette front-loaded with virus carrying  
327 GCaMP6f (AAV1-hSyn-GCaMP6f-WPRE-SV40,  $2.3 \times 10^{13}$  gc/mL, catalog # 100837-AAV1,  
328 Addgene) was lowered into GC (1.9-2.0 mm below the dura) and a microinjection syringe pump  
329 (UMP3T-1, World Precision Instruments) was used to inject a total of 200 nL virus at 1 nL/s. Two  
330 viral injections (100 nL each) were performed at two different anterior-posterior locations (1.2 mm  
331 and 0.9 mm anterior to bregma). After each injection, the pipette was left in place for five minutes  
332 before being slowly retracted. In a subset of mice (n= 3), we also injected 100 nL anterograde viral  
333 tracer (AAV1-CB7-CI-TurboRFP-WPRE-RBG,  $2.2 \times 10^{12}$  gc/mL, catalog # 105546-AAV1,  
334 Addgene) into the ventral posteromedial parvocellularis (VPMpc) of thalamus (AP: -1.8 mm, ML:  
335 0.6 mm relative to bregma, DV: -4.0 mm below dura). The craniotomy was covered with silicone  
336 gel and the scalp was sutured close. After the surgery was complete, Antisedan (atipamezole  
337 hydrochloride, 1 mg/kg) and lactated ringer's solution were administered subcutaneously to  
338 reverse anesthesia and for hydration respectively.

339 Two to three weeks after viral injection, mice were implanted with prisms. Mice were  
340 anesthetized with an intraperitoneal injection of a mixture of dexmedetomidine and ketamine as  
341 described above. Once fully anesthetized, mice were subcutaneously injected with carprofen (5  
342 mg/kg) and dexamethasone (2 mg/kg). The left eye was sutured close. The scalp and the skin  
343 between the left eye and ear were removed. Bupivacaine (2.5 mg/mL, 0.01-0.02 mL) was injected  
344 into the temporalis muscles for local anesthesia. Portions of the temporalis muscles were removed,  
345 and a ~ 2.2 x 2.2 mm cranial window was opened on the lateral portion of the skull to directly  
346 expose the surface of GC (bottom of the craniotomy window was at the squamosal plate). The  
347 middle cerebral artery and rhinal vein were used as surgical landmarks for GC. A glass prism  
348 assembly was implanted to cover the craniotomy and secured in place with Vetbond and black  
349 dental acrylic. The glass prism assembly was fabricated by gluing with optic glue (NOA61) a  
350 coverslip (#1 thickness) onto the surface of a 2 mm prism (MPCH-2.0, Tower Optics) that faces  
351 the gustatory cortex and gluing another coverslip on the hypotenuse. A customized headpost was  
352 cemented to the dorsal portion of the skull for head restraint. Mice were injected with carprofen (5  
353 mg/kg, subcutaneous) daily for three days after the surgery to reduce inflammation.

354

### 355 **Cued-taste paradigm**

356 Following recovery, mice were placed on water restriction, with 1.5 mL water given daily  
357 for one week before training. Weight was monitored and maintained at > 80% of the initial weight  
358 before water restriction. In the first phase of training, mice were habituated to licking a spout after  
359 a 2 s cue to receive water. For each trial, a 2 s auditory tone was presented (2k Hz, 70 dB) and a  
360 motorized spout (X-LSM motor, Zaber) moved in front of the animal's mouth. The offset of the  
361 tone and the end of spout movement were aligned. Mice were required to lick the dry spout once  
362 to trigger the delivery of two drops of water (3  $\mu$ L each) and the spout remained in place for 3 s to  
363 allow the mouse to consume the water before retracting. A rinse with two drops of water was also  
364 introduced after each trial (a rinsed was introduced  $7.8 \pm 0.5$  s after taste delivery). The inter-trial  
365 interval was  $12 \pm 2.5$  s and an additional 25 s timeout was triggered if mice failed to lick after the  
366 cue. Once mice started to reliably perform a dry lick for water (1-2 sessions, performance > 90%),  
367 the number of dry licks required to trigger water delivery was increased (from 1 to 5). Mice were  
368 then habituated to the 5 dry licks (4-5 sessions). After water habituation training, training began  
369 with the five gustatory stimuli (sucrose [200 mM], NaCl [100 mM], citric acid [20 mM], quinine



370 [1 mM] and water). Trials for each tastant were presented in a random order (random permutation,  
371 on average 20 trials for each taste). On day one, mice showed significantly longer duration of  
372 licking to S and N, than to CA and Q (S:  $3.6 \pm 0.1$  s; N:  $3.5 \pm 0.1$  s; CA:  $2.9 \pm 0.1$  s; Q:  $2.5 \pm 0.2$   
373 s; W:  $3.1 \pm 0.1$  s; One-way ANOVA,  $F(4,60) = 12.5$ ,  $p < 0.001$ , post hoc Tukey's HSD test,  $p$   
374  $< 0.05$ ). After a week of habituation, mice showed comparable duration of licking to each of the  
375 tastants, and imaging experiments started. Gustatory stimuli were delivered via a gravity-based  
376 taste delivery system. The spout was composed of five independent polyamide tubes, each  
377 connected to a taste line. An infrared beam (940 nm, powered by a fiber-coupled LED, Thorlabs)  
378 was positioned in front of the mouth for lick detection. Behavioral events and licking data were  
379 recorded with RHD2000 recording system (C3100, Intan Technologies).

380

### 381 **Two-photon calcium imaging**

382 Imaging experiments started after mice were habituated for at least seven sessions to lick  
383 for the five gustatory stimuli. Images were acquired using a movable objective microscope (MOM,  
384 Sutter) with a resonant scanning module controlled by MScan (Sutter). The light source was a  
385 Ti:sapphire laser (Coherent) and an Olympus LCPLN20XIR objective (NA: 0.45, air, working  
386 distance: 8 mm) was used. GCaMP6f was excited at 940 nm with a laser power of 50-80mW at  
387 the front of the objective. Images (512 x 512 pixels) were acquired at 31 Hz with a 450 x 450  $\mu\text{m}$   
388 field of view (100-230  $\mu\text{m}$  below the brain surface). Three hundred images (9.67 s long) were  
389 acquired for each trial (from 2 s before the cue to 7.67 s after the cue onset) and frame signals were  
390 synchronized with behavioral events through a RHD2000 recording system (Intan Technologies).  
391 In total, imaging data for 50-60 trials were acquired (10-12 trials for each tastant).

392

### 393 **Widefield calcium imaging**

394 Images were acquired using a CMOS camera (FL3-U3-13E4M-C, FLIR) installed on the  
395 movable objective microscope (MOM, Sutter). The light source was a xenon arc lamp (Lambda  
396 LS, Sutter) filtered through a GFP filter cube. An Olympus XLFluor4x/340 objective (NA: 0.28,  
397 air, working distance: 29.5 mm) was used. FlyCapture (FLIR) was used to control imaging  
398 parameters and frames were taken at 16.6 Hz with a resolution of 1280 x 1024 pixels (~2 x 1.6  
399 mm). Frame signals were synchronized with behavioral events through a RHD2000 recording  
400 system (Intan Technologies).

## 401 **Data Analysis**

402 Data analysis was performed using ImageJ (NIH) and custom scripts written in MATLAB  
403 (MathWorks, Natick, MA).

404

## 405 **Behavioral analysis**

406 The analog trace from the infrared beam was used for analyzing licking behaviors. A  
407 licking event was detected whenever the trace crossed a fixed threshold. Only licking within 7.5 s  
408 after the auditory cue were used for analysis (i.e., licking for rinses was not analyzed). A licking  
409 bout was defined as a train of at least three consecutive licks with an inter-lick interval shorter than  
410 500 ms [39].

411

## 412 **Calcium imaging data analysis**

413 For two-photon calcium imaging, images recorded for each trial (300 frames) were down-  
414 sampled from 31 Hz to 6.2 Hz with ImageJ (group z-projection) and concatenated across trials.  
415 Motion correction was performed with a package for piecewise rigid motion correction of calcium  
416 imaging data (NoRMCorre, <https://github.com/flatironinstitute/NoRMCorre>) [40]. Regions of  
417 interest (ROIs) corresponding to cell bodies, calcium traces and deconvolved activity were  
418 automatically extracted with the constrained nonnegative matrix factorization (CNMF)-based  
419 algorithm (<https://github.com/flatironinstitute/CaImAn-MATLAB>) [19]. The automatically  
420 detected ROIs were further manually corrected based on ROIs' shape and calcium traces. For  
421 widefield imaging, videos were down-sampled from 16.6 Hz to 8.3 Hz with ImageJ (group z-  
422 projection). Motion correction was also performed with the NoRMCorre package. ROIs, calcium  
423 traces and deconvolved activity were automatically extracted with the CNMF-E package, an  
424 extension of the CNMF algorithm for one-photon imaging data  
425 ([https://github.com/zhoupc/CNMF\\_E](https://github.com/zhoupc/CNMF_E)) [41]. The automatically detected ROIs were further  
426 manually corrected based on ROIs' shape and calcium traces.

427 ROIs (putative cells) were categorized as responsive to cue, licking initiation or gustatory  
428 stimuli based on the deconvolved activity. Only excitatory responses were analyzed. For cue  
429 response, we compared the mean baseline activity (1 s before auditory tone) to the mean activity  
430 during stimulus, but before licking initiation (Wilcoxon rank sum test,  $p < 0.05$ ). For licking  
431 response, we compared the mean baseline activity (1 s before auditory tone) to the mean activity

432 following the onset of the first lick, but before taste delivery, or 1 s following the first lick if taste  
433 delivery came later than 1 s (Wilcoxon rank sum test  $p < 0.05$ ). For cells that were responsive to  
434 both cue and licking, we further compared the mean activity before licking (0.5 s before licking)  
435 to the mean activity following licking (1 s or before taste delivery, Wilcoxon rank sum test  $p < 0.05$ ).  
436 This comparison was used to recategorize cells where observed licking response might be a  
437 carryover of the cue response. For taste responses, we compared the mean baseline activity (1 s  
438 before auditory tone) to the mean activity (1 s) centered on the peak of the response generated  
439 following taste delivery (within 3.5 s, Wilcoxon rank sum test,  $p < 0.05$ ). For cells responsive to all  
440 five gustatory stimuli and licking, we additionally compared the mean activity before taste delivery  
441 (0.5 s before taste delivery) to the mean activity (1 s) centered on the peak of the response generated  
442 following taste delivery (within 3.5 s, Wilcoxon rank sum test,  $p < 0.05$ ). This additional test was  
443 used to eliminate cells where observed gustatory response might be a carryover of the licking  
444 response. Taste-responsive neurons were also categorized based on their best responses.  
445 Specifically, a neuron's best response was defined as the strongest taste-evoked response following  
446 taste delivery (within a 3.5 s window).

447 For hierarchical clustering analysis, taste-evoked deconvolved activity (peak response  
448 within 3.5 s after taste delivery) for each neuron was normalized to the maximum taste-evoked  
449 response (best response) for that cell. MATLAB functions including “linkage”, “cluster” and  
450 “dendrogram” were used to perform the agglomerative hierarchical clustering. Results of  
451 hierarchical clustering were also confirmed by using the evoked change of fluorescence intensity  
452 ( $\Delta F/F$ ).

453 To assess breadth of tuning [24], we calculated the entropy (H) for each taste-responsive  
454 neuron with the following equation:  $H = -K(\sum_{i=1}^5 P_i \log P_i)$ , where  $P_i$  represents the  
455 proportional response to each of the 5 gustatory stimuli and K is a scaling constant ( $K = 1.431$  for  
456 5 tastants). Entropy value (H) ranges between 0 and 1, where 0 represents a neuron responds  
457 exclusive to one stimulus (narrowly tuned) and 1 presents a neuron responds equivalently to all 5  
458 stimuli (broadly tuned).

459 To evaluate whether responses to taste qualities, cue and licking were spatially clustered,  
460 we calculated the pairwise distance between neurons (sessions with at least 3 neurons) responding  
461 to each of the five gustatory stimuli (16 out of 16 sessions), cue (15 out of 16 sessions) or licks (15  
462 out of 16 sessions). We then calculated distance between the same number of randomly chosen

463 neurons in the fields and repeated this procedure 1000 times. The mean distance between taste-  
464 responsive neurons was compared to the mean distance between randomly chosen neurons for  
465 each session (permutation test). Significant difference was defined based on whether the average  
466 distance between taste-responsive neurons was below the lowest 5% of the distance between  
467 random neurons (One-tailed permutation test,  $p < 0.05$ ). We also repeated this analysis with a  
468 stricter threshold (One-tailed permutation test,  $p < 0.01$ ). With this more stringent criterion, the  
469 distance between taste-responsive neurons was significantly smaller than the distance between  
470 randomly selected neurons in even fewer sessions than with the  $p < 0.05$  criterion. For the two-  
471 photon imaging dataset, we observed only three instances of significance (S:15/16 sessions, N:  
472 16/16 sessions, CA: 16/16 sessions; Q: 15/16 sessions; W: 15/16 sessions), This was also the case  
473 for widefield imaging dataset, in which we observed only on instance where the distance between  
474 taste-responsive neurons was significantly smaller than the distance between randomly selected  
475 neurons (S:4 of 4 sessions, N: 4 of 4 sessions, CA: 4 of 4 sessions, Q: 4 of 4 sessions, W: 3 of 4  
476 sessions).

477 To further quantify spatial clustering, we identified the centroids of clusters of neurons  
478 responding to each gustatory stimulus and compared intra-cluster distance with the inter-cluster  
479 distance. For instance, for neurons responding to sucrose, the intra-cluster distance was calculated  
480 as the distance between each neuron and the centroid of all neurons responding to sucrose ( $D_{S-S}$ ),  
481 the inter-cluster distance was calculated as the distance between each neuron responding to sucrose  
482 to the centroids of clusters of neurons responding to NaCl ( $D_{S-N}$ ), citric acid ( $D_{S-CA}$ ), quinine ( $D_{S-Q}$ )  
483 and water ( $D_{S-W}$ ) (see **Supplementary Figure 1B** and **3C**). The normalized intra-cluster  
484 distance of neurons responding to each taste quality was calculated as the ratio between the intra-  
485 cluster distance and the average inter-cluster distance (**Figure 5E**). The intra-cluster and inter-  
486 cluster distance of neurons responding to cue, or lick was calculated in a similar way  
487 (**Supplementary Figure 2F**).

488

### 489 **Histological staining**

490 Mice were deeply anesthetized with an intraperitoneal injection of a mixture of ketamine  
491 (140 mg/kg) and dexmedetomidine (2 mg/kg). Once fully anesthetized, mice were first  
492 intracardially perfused with 1x PBS followed by 4% paraformaldehyde. The brain was post-fixed  
493 overnight in 4% paraformaldehyde, then transferred to 30% sucrose until sunk (2-3 days). Brains

494 were cut on a cryostat (HM505, Leica) into 50  $\mu$ m coronal slices. Sections were washed in PBS,  
495 counterstained with Hoechst 33342 (1:5000 dilution, H3570, ThermoFisher, Waltham, MA),  
496 mounted on glass slides and imaged on a confocal microscope (LSM800, Zeiss).

497 **FIGURES and LEGENDS**

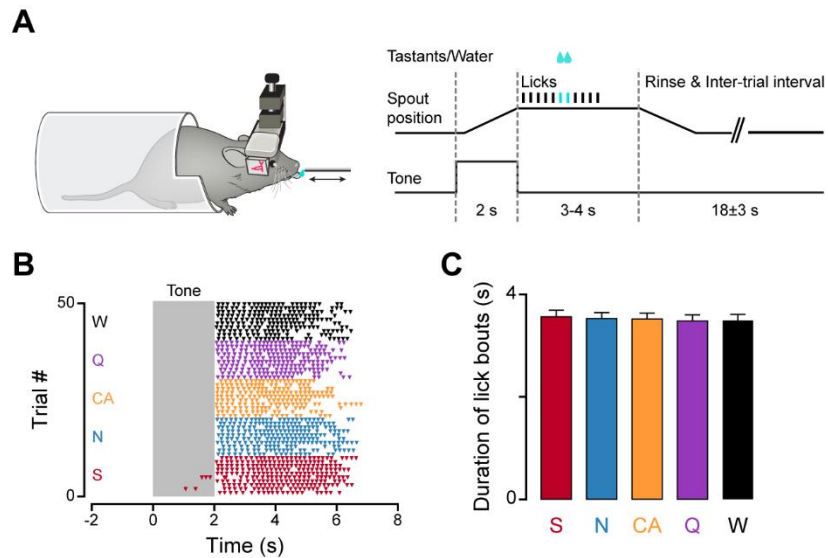

498

499 **Figure 1: Behavioral paradigm.** A, Left panel: Sketch showing a head-fixed, prism-implanted  
500 mouse licking a movable spout. Right panel: schematic diagram of the structure of each trial. B,  
501 Representative raster plot of licking to the five gustatory stimuli (sucrose: S, red; NaCl: N, blue;  
502 citric acid: CA, gold; quinine: Q, purple; water: W, black) in the cued-taste paradigm after  
503 habituating mice to the five tastants. Time 0 is the onset of the auditory cue and the shaded area  
504 represents the 2 s long auditory cue. Each triangle marker represents an individual lick. C, Bar  
505 plots representing the average duration of licking bouts (n = 13 mice) for the five gustatory stimuli  
506 after habituating mice to the cued-taste training. Error bars represent the standard error mean  
507 (SEM). One-way ANOVA with post hoc Tukey's HSD test, p > 0.05.

508

509

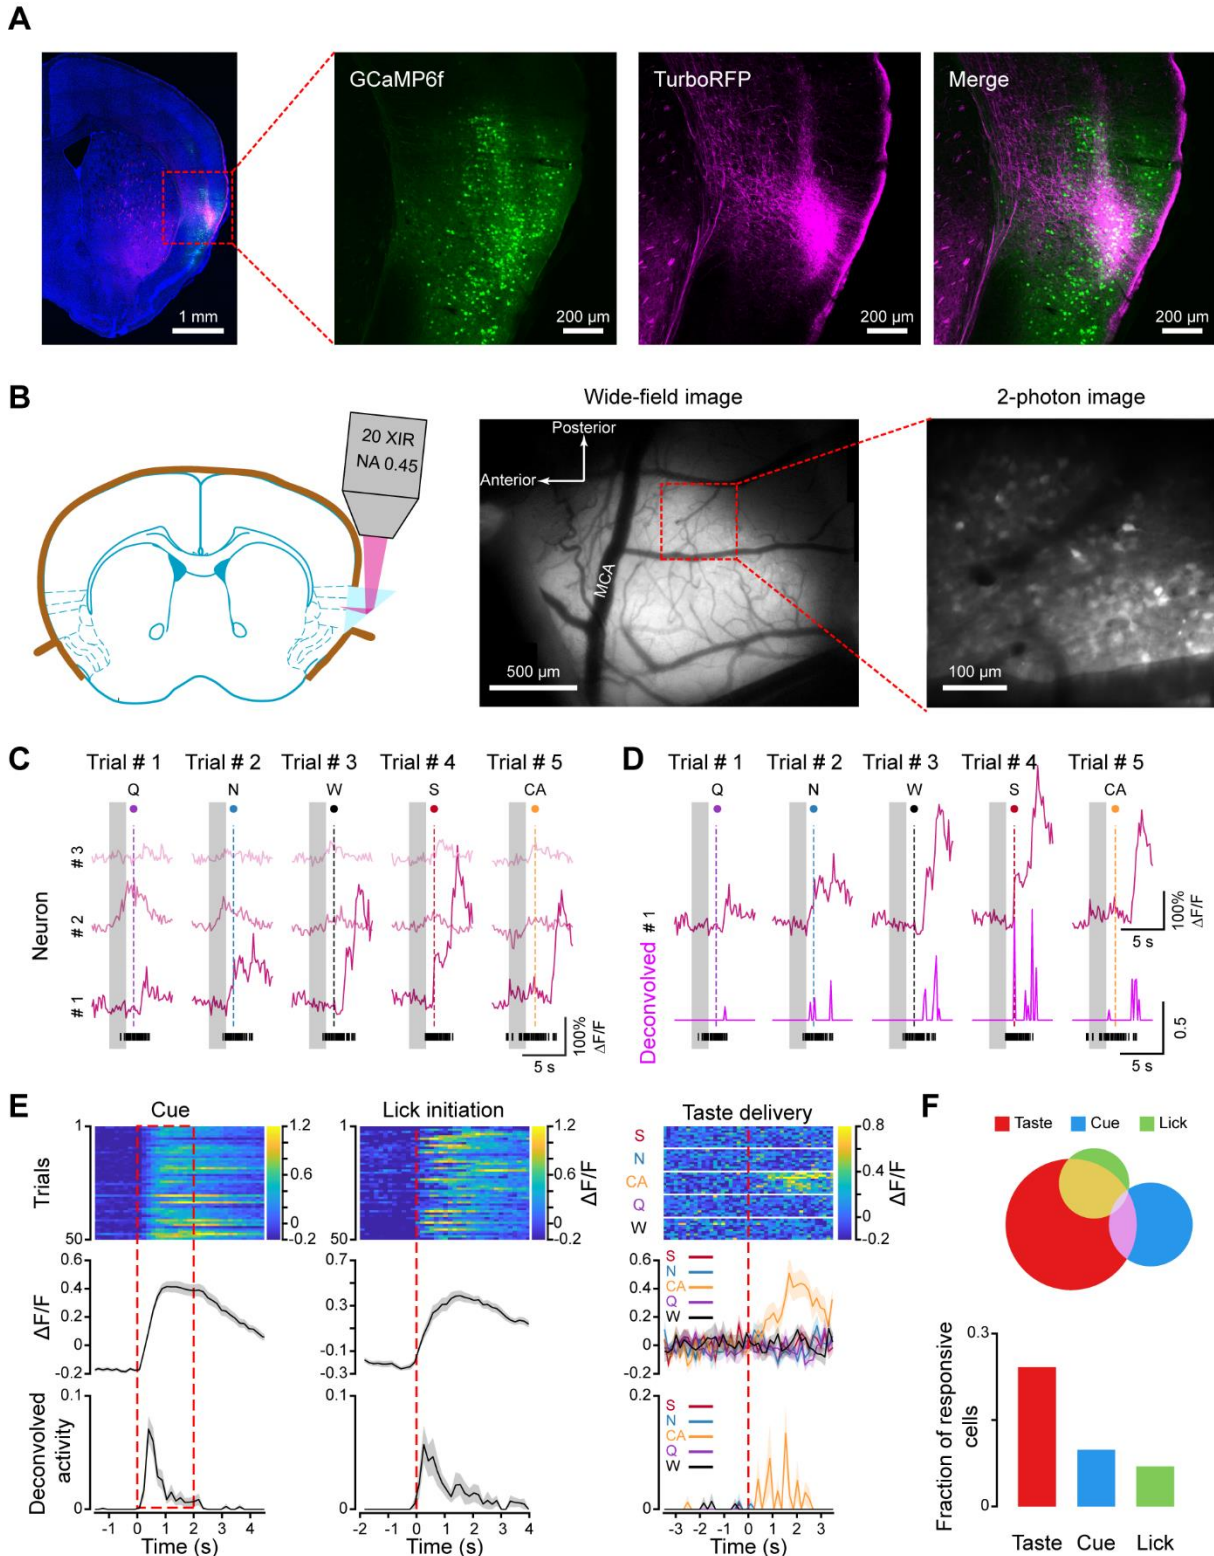

514 positioned on the surface of GC with a 20 x air objective (NA: 0.45) used for imaging. Middle  
515 panel: a widefield image showing the expression of GCaMP6f (white) and the middle cerebral  
516 artery (MCA). Right panel: a two-photon image from the representative field marked on the  
517 widefield image. **C**, Representative calcium traces ( $\Delta F/F$ ) of three cells (# 1, # 2, # 3) in five  
518 consecutive trials. Gray bars represent the 2 s long cue. Dashed lines represent the delivery of the  
519 five gustatory stimuli (in the order of Q, N, W, S and CA). Black vertical ticks at the bottom  
520 represent licks. **D**, Calcium traces ( $\Delta F/F$ ) from cell # 1 in panel **C** and corresponding deconvolved  
521 neural activity (magenta traces) in five consecutive trials. Black vertical ticks at the bottom  
522 represent licks. **E**, Three representative neurons responding to cue (left), licking (middle) and  
523 tastants (right). Top panel: heatmap for the changes in fluorescent intensity ( $\Delta F/F$ ) evoked by cue  
524 (left), lick initiation (middle) and tastants (right). Each row represents a trial. Middle panel:  
525 average change of fluorescent intensity. Bottom panel: average deconvolved neural activity  
526 evoked by the cue, licking initiation and gustatory stimuli. For cue response, time 0 is the onset of  
527 the auditory cue. For licking response, time 0 is the initiation of licking. For taste response, time 0  
528 is the delivery of the tastants. The shaded area around the curve indicates the SEM. **F**,  
529 Quantification of neurons responsive to cue, licking initiation and tastants. Top panel: Venn  
530 diagram showing the overlap of neurons representing cue, lick and tastants. Bottom panel: bar  
531 graph showing the fraction of neurons responsive to cue, lick and tastants.



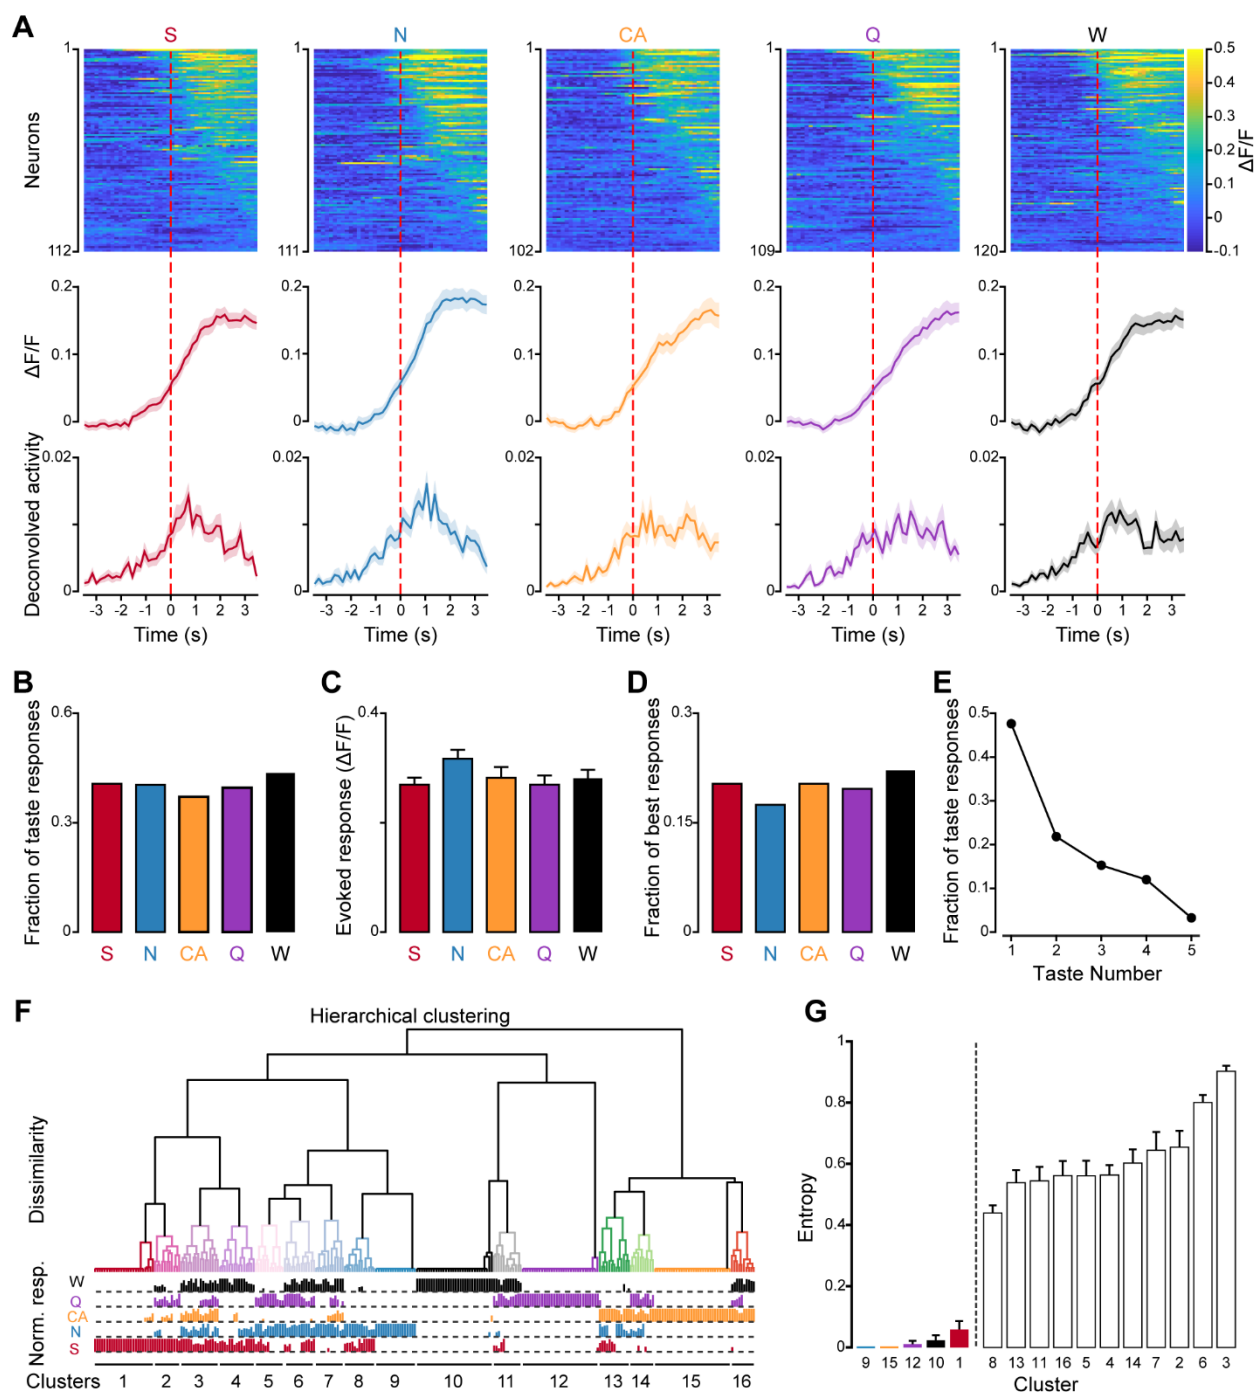

532  
 533 **Figure 3: Taste response in GC from awake behaving mice.** A, Top panel, heatmap of  
 534 population activity for each of the five gustatory stimuli. Each row represents a single neuron. The  
 535 color represents the change of fluorescent intensity ( $\Delta F/F$ ). Middle panel, average of the change  
 536 in fluorescent intensity ( $\Delta F/F$ ) across neurons responsive to each of the five gustatory stimuli.  
 537 Bottom panel, average of the deconvolved activity across neurons responsive to each of the five  
 538 gustatory stimuli. The dash line (time 0) represents the taste delivery. The shaded area around the

539 curve indicates the SEM. **B**, Bar graph showing the fraction of taste-responsive neurons to each of  
540 the five tastants. **C**. Bar graph showing the average amplitude of evoked responses to the five  
541 tastants. **D**, Bar graph showing the fraction of neurons with best responses to each of the five  
542 tastants. **E**, Tuning curve showing the fraction of neurons responding to 1, 2, 3, 4 and all 5 tastants.  
543 **F**, Top panel: dendrogram of hierarchical clustering analysis based on normalized responses. The  
544 16 colors of the dendrogram represent 16 clusters. Bottom panel: bar graph of normalized  
545 responses. Each column represents an individual neuron. Each row represents the normalized  
546 response to each tastant. **G**, Bar graph showing the average entropy of cells belonging to each  
547 cluster.

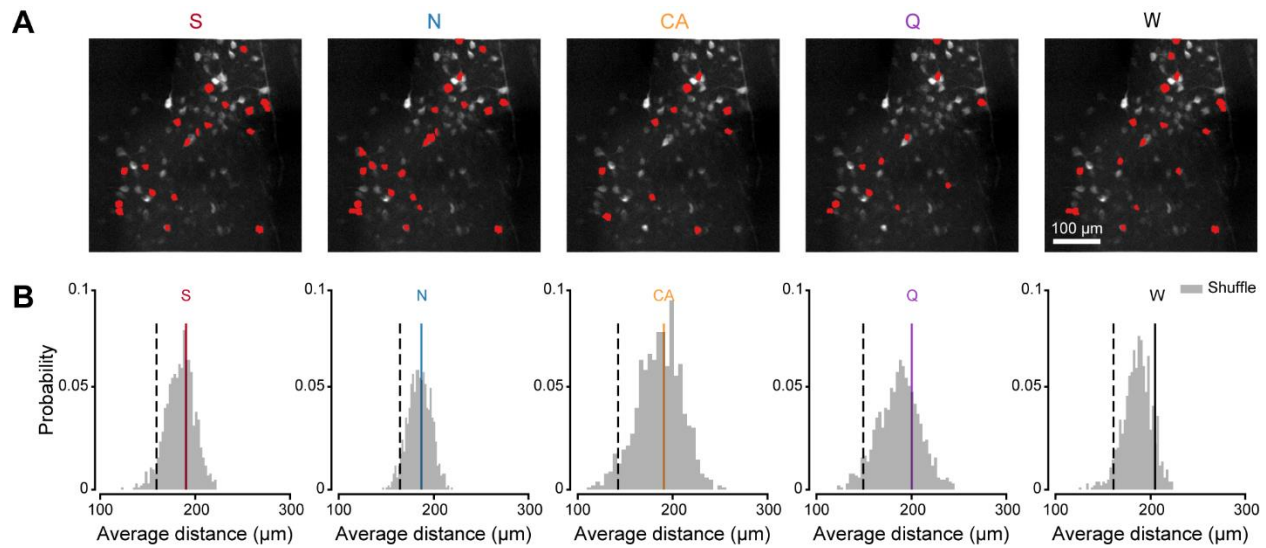

548

549 **Figure 4: Spatial representation of taste qualities with two-photon imaging.** **A**, Representative  
550 two-photon images from the same field showing the location of neurons (red markers) responding  
551 to S, N, CA, Q and W. **B** Representative histograms showing the distribution of average pairwise  
552 distance between randomly chosen neurons (grey). The black dashed lines mark the boundary of  
553 the lowest 5% average pairwise distance for the random distribution. Colored lines represent the  
554 average pairwise distance between neurons with response to S (red), N (blue), CA (orange), Q  
555 (purple) and W (black), as shown in **A**.

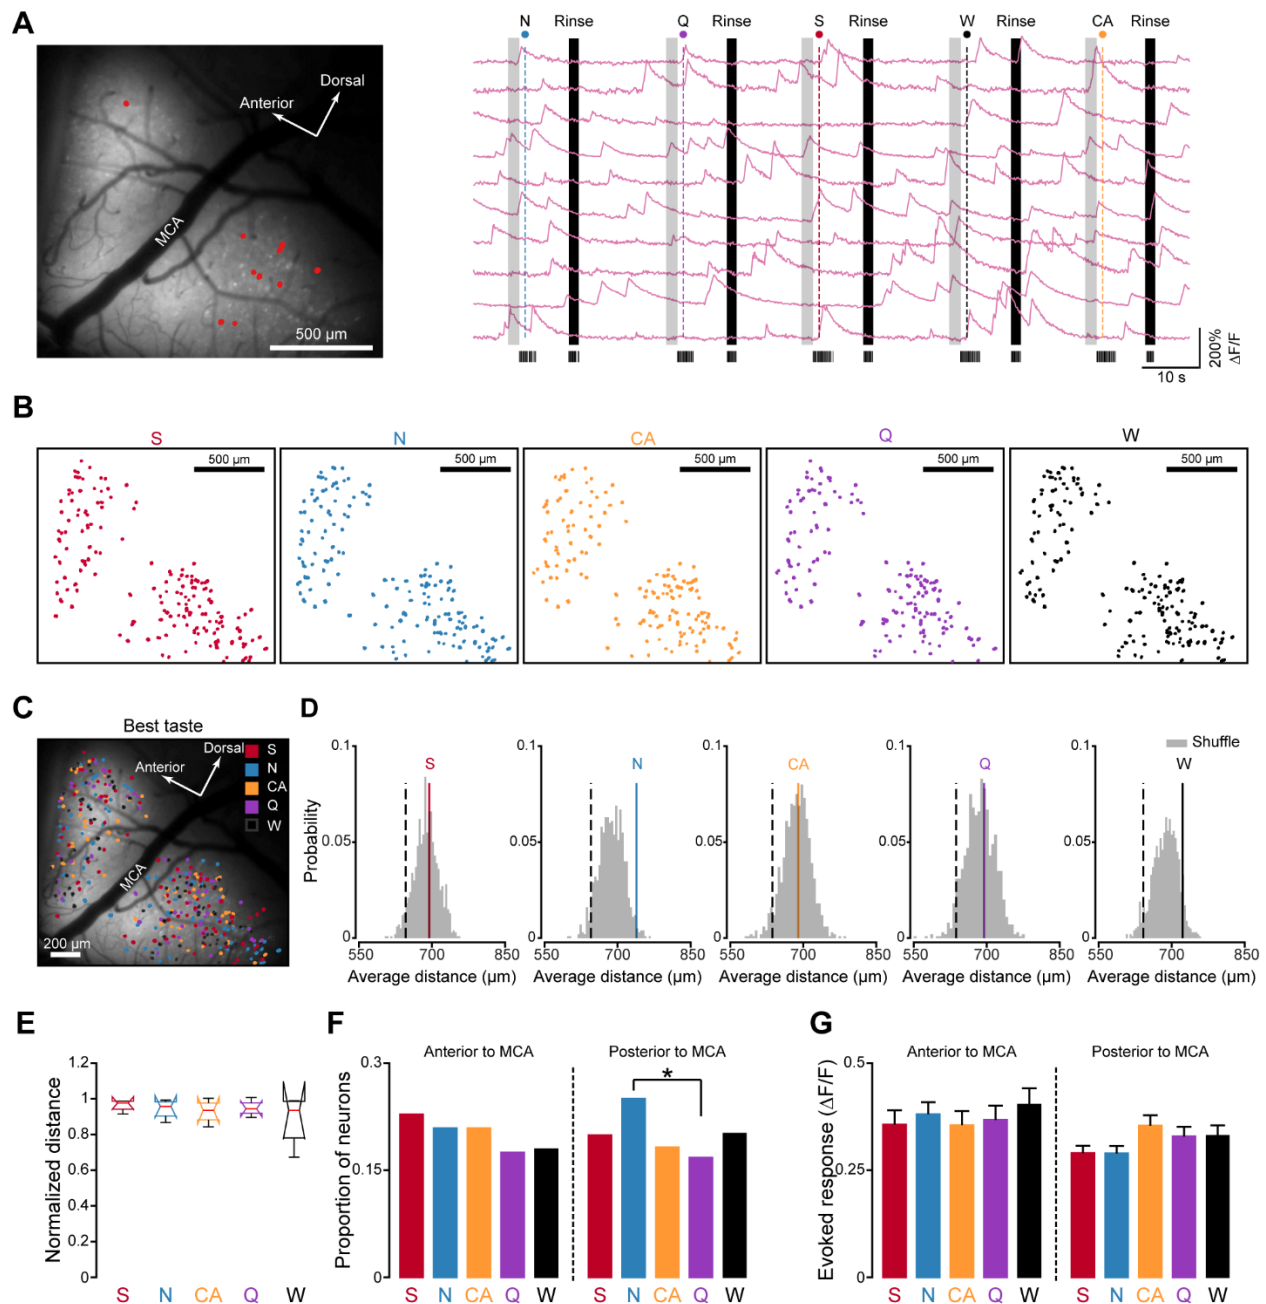

556

557 **Figure 5: Spatial representation of taste qualities with widefield imaging.** **A**, Left panel, a  
 558 representative widefield image showing the expression of GCaMP6f (white) and the middle  
 559 cerebral artery (MCA). Right panel, representative calcium traces ( $\Delta F/F$ ) of 10 example neurons  
 560 (marked as red dots on the left widefield image) in 5 consecutive trials. Gray bars represent the 2  
 561 s auditory cue. Dash lines represent taste delivery. Black bars represent the rinse. The bottom black  
 562 ticks represent licks. **B**, Representative spatial locations of neurons responding to S, N, CA, Q and  
 563 W. The field of the spatial map is the same as the one shown in **A**. Notice the distributed

564 organization of neurons responding to the five tastants. **C**, Representative spatial map of neurons  
565 with best responses to S (red), N (blue), CA (orange), Q (purple) and W (black). **D**, Representative  
566 histograms showing the distribution of average pairwise distance between randomly chosen  
567 neurons (grey). The black dashed lines mark the boundary of the lowest 5% average pairwise  
568 distance for the random distribution. Colored lines represent the average pairwise distance between  
569 neurons with best response to S (red), N (blue), CA (orange), Q (purple) and W (black), as shown  
570 in **C**. **E**, Box plot of the normalized intra-cluster distance of neurons with best responses to S, N,  
571 CA, Q and W. Distance was normalized to the average inter-cluster distance (n = 4 sessions). **F**,  
572 Bar graph showing the proportion of taste-responsive neurons anterior to MCA (n = 206, left side  
573 of the vertical dash line) and posterior to MCA (n = 412, right side of the vertical dash line) with  
574 best responses to S, N, CA, Q and W. Pearson's  $\chi^2$  test with Bonferroni correction, \* represents  
575 adjusted  $p < 0.05$ . **G**, Bar graph showing average amplitude of evoked best responses to the five  
576 tastants for neurons anterior (n = 206, left side of the vertical dash line) and posterior to MCA (n  
577 = 412, right side of the vertical dash line). Error bars represent the SEM.

578

579

580 **Supplementary Video 1: A video of neural activity from mouse gustatory cortex imaged**  
581 **through a prism with two-photo microscopy.** The video is played at 5 times of the actual speed.

582

583 **Supplementary Video 2: A video of neural activity from mouse gustatory cortex imaged**  
584 **through a prism with widefield imaging.** The video is played at 5 times of the actual speed.

585

586 **REFERENCES**

- 587 1. Bonin, V., Histed, M.H., Yurgenson, S., and Reid, R.C. (2011). Local diversity and fine-  
588 scale organization of receptive fields in mouse visual cortex. *J Neurosci* 31, 18506-18521.
- 589 2. Clancy, K.B., Schnepel, P., Rao, A.T., and Feldman, D.E. (2015). Structure of a single  
590 whisker representation in layer 2 of mouse somatosensory cortex. *J Neurosci* 35, 3946-  
591 3958.
- 592 3. Ohki, K., Chung, S., Ch'ng, Y.H., Kara, P., and Reid, R.C. (2005). Functional imaging with  
593 cellular resolution reveals precise micro-architecture in visual cortex. *Nature* 433, 597-603.
- 594 4. Sato, T.R., Gray, N.W., Mainen, Z.F., and Svoboda, K. (2007). The functional  
595 microarchitecture of the mouse barrel cortex. *PLoS Biol* 5, e189.
- 596 5. Rothschild, G., Nelken, I., and Mizrahi, A. (2010). Functional organization and population  
597 dynamics in the mouse primary auditory cortex. *Nat Neurosci* 13, 353-360.
- 598 6. Romero, S., Hight, A.E., Clayton, K.K., Resnik, J., Williamson, R.S., Hancock, K.E., and  
599 Polley, D.B. (2019). Cellular and Widefield Imaging of Sound Frequency Organization in  
600 Primary and Higher Order Fields of the Mouse Auditory Cortex. *Cereb Cortex*.
- 601 7. Stettler, D.D., and Axel, R. (2009). Representations of odor in the piriform cortex. *Neuron*  
602 63, 854-864.
- 603 8. Roland, B., Deneux, T., Franks, K.M., Bathellier, B., and Fleischmann, A. (2017). Odor  
604 identity coding by distributed ensembles of neurons in the mouse olfactory cortex. *Elife* 6.
- 605 9. Sugita, M., and Shiba, Y. (2005). Genetic tracing shows segregation of taste neuronal  
606 circuitries for bitter and sweet. *Science* 309, 781-785.
- 607 10. Peng, Y., Gillis-Smith, S., Jin, H., Trankner, D., Ryba, N.J., and Zuker, C.S. (2015). Sweet  
608 and bitter taste in the brain of awake behaving animals. *Nature* 527, 512-515.
- 609 11. Chen, X., Gabitto, M., Peng, Y., Ryba, N.J., and Zuker, C.S. (2011). A gustotopic map of  
610 taste qualities in the mammalian brain. *Science* 333, 1262-1266.
- 611 12. Lavi, K., Jacobson, G.A., Rosenblum, K., and Luthi, A. (2018). Encoding of Conditioned  
612 Taste Aversion in Cortico-Amygdala Circuits. *Cell Rep* 24, 278-283.
- 613 13. Fletcher, M.L., Ogg, M.C., Lu, L., Ogg, R.J., and Boughter, J.D., Jr. (2017). Overlapping  
614 Representation of Primary Tastes in a Defined Region of the Gustatory Cortex. *J Neurosci*  
615 37, 7595-7605.
- 616 14. Accolla, R., Bathellier, B., Petersen, C.C., and Carleton, A. (2007). Differential spatial  
617 representation of taste modalities in the rat gustatory cortex. *J Neurosci* 27, 1396-1404.
- 618 15. Vincis, R., Gschwend, O., Bhaukaurally, K., Beroud, J., and Carleton, A. (2012). Dense  
619 representation of natural odorants in the mouse olfactory bulb. *Nat Neurosci* 15, 537-539.
- 620 16. Fontanini, A., and Katz, D.B. (2006). State-dependent modulation of time-varying  
621 gustatory responses. *J Neurophysiol* 96, 3183-3193.
- 622 17. Livneh, Y., Ramesh, R.N., Burgess, C.R., Levandowski, K.M., Madara, J.C., Fenselau, H.,  
623 Goldey, G.J., Diaz, V.E., Jikomes, N., Resch, J.M., et al. (2017). Homeostatic circuits  
624 selectively gate food cue responses in insular cortex. *Nature* 546, 611-616.

- 625 18. Chen, T.W., Wardill, T.J., Sun, Y., Pulver, S.R., Renninger, S.L., Baohan, A., Schreiter,  
626 E.R., Kerr, R.A., Orger, M.B., Jayaraman, V., et al. (2013). Ultrasensitive fluorescent  
627 proteins for imaging neuronal activity. *Nature* 499, 295-300.
- 628 19. Pnevmatikakis, E.A., Soudry, D., Gao, Y., Machado, T.A., Merel, J., Pfau, D., Reardon,  
629 T., Mu, Y., Lacefield, C., Yang, W., et al. (2016). Simultaneous Denoising, Deconvolution,  
630 and Demixing of Calcium Imaging Data. *Neuron* 89, 285-299.
- 631 20. Vincis, R., and Fontanini, A. (2016). Associative learning changes cross-modal  
632 representations in the gustatory cortex. *Elife* 5.
- 633 21. Gardner, M.P., and Fontanini, A. (2014). Encoding and tracking of outcome-specific  
634 expectancy in the gustatory cortex of alert rats. *J Neurosci* 34, 13000-13017.
- 635 22. Stapleton, J.R., Lavine, M.L., Wolpert, R.L., Nicolelis, M.A., and Simon, S.A. (2006).  
636 Rapid taste responses in the gustatory cortex during licking. *J Neurosci* 26, 4126-4138.
- 637 23. Gutierrez, R., Simon, S.A., and Nicolelis, M.A. (2010). Licking-induced synchrony in the  
638 taste-reward circuit improves cue discrimination during learning. *J Neurosci* 30, 287-303.
- 639 24. Smith, D.V., and Travers, J.B. (1979). A metric for the breadth of tuning of gustatory  
640 neurons. *Chem Senses* 4, 215-229.
- 641 25. Gehrlach, D.A., Dolensek, N., Klein, A.S., Roy Chowdhury, R., Matthys, A., Junghanel,  
642 M., Gaitanos, T.N., Podgornik, A., Black, T.D., Reddy Vaka, N., et al. (2019). Aversive  
643 state processing in the posterior insular cortex. *Nat Neurosci* 22, 1424-1437.
- 644 26. Samuelsen, C.L., Gardner, M.P., and Fontanini, A. (2012). Effects of cue-triggered  
645 expectation on cortical processing of taste. *Neuron* 74, 410-422.
- 646 27. Fonseca, E., de Lafuente, V., Simon, S.A., and Gutierrez, R. (2018). Sucrose intensity  
647 coding and decision-making in rat gustatory cortices. *Elife* 7.
- 648 28. Levitan, D., Lin, J.Y., Wachutka, J., Mukherjee, N., Nelson, S.B., and Katz, D.B. (2019).  
649 Single and population coding of taste in the gustatory cortex of awake mice. *J Neurophysiol*  
650 122, 1342-1356.
- 651 29. Tang, S., Zhang, Y., Li, Z., Li, M., Liu, F., Jiang, H., and Lee, T.S. (2018). Large-scale  
652 two-photon imaging revealed super-sparse population codes in the V1 superficial layer of  
653 awake monkeys. *Elife* 7.
- 654 30. Ranjbar-Slamloo, Y., and Arabzadeh, E. (2019). Diverse tuning underlies sparse activity  
655 in layer 2/3 vibrissal cortex of awake mice. *J Physiol* 597, 2803-2817.
- 656 31. Adesnik, H., and Naka, A. (2018). Cracking the Function of Layers in the Sensory Cortex.  
657 *Neuron* 100, 1028-1043.
- 658 32. Samuelsen, C.L., and Fontanini, A. (2017). Processing of Intraoral Olfactory and Gustatory  
659 Signals in the Gustatory Cortex of Awake Rats. *J Neurosci* 37, 244-257.
- 660 33. Maier, J.X. (2017). Single-neuron responses to intraoral delivery of odor solutions in  
661 primary olfactory and gustatory cortex. *J Neurophysiol* 117, 1293-1304.
- 662 34. Vincis, R., Chen, K., Czarnecki, L., Chen, J., and Fontanini, A. (2020). Dynamic  
663 Representation of Taste-Related Decisions in the Gustatory Insular Cortex of Mice. *Curr*  
664 *Biol.*

- 665 35. Yoshimura, H., Sugai, T., Fukuda, M., Segami, N., and Onoda, N. (2004). Cortical spatial  
666 aspects of optical intrinsic signals in response to sucrose and NaCl stimuli. *Neuroreport* *15*,  
667 17-20.
- 668 36. Guo, W., Chambers, A.R., Darrow, K.N., Hancock, K.E., Shinn-Cunningham, B.G., and  
669 Polley, D.B. (2012). Robustness of cortical topography across fields, laminae, anesthetic  
670 states, and neurophysiological signal types. *J Neurosci* *32*, 9159-9172.
- 671 37. Wu, A., Dvoryanchikov, G., Pereira, E., Chaudhari, N., and Roper, S.D. (2015). Breadth  
672 of tuning in taste afferent neurons varies with stimulus strength. *Nat Commun* *6*, 8171.
- 673 38. Bouaichi, C.G., and Vincis, R. (2020). Cortical processing of chemosensory and hedonic  
674 features of taste in active licking mice. *J Neurophysiol*.
- 675 39. Davis, J.D., and Smith, G.P. (1992). Analysis of the microstructure of the rhythmic tongue  
676 movements of rats ingesting maltose and sucrose solutions. *Behav Neurosci* *106*, 217-228.
- 677 40. Pnevmatikakis, E.A., and Giovannucci, A. (2017). NoRMCorre: An online algorithm for  
678 piecewise rigid motion correction of calcium imaging data. *J Neurosci Methods* *291*, 83-  
679 94.
- 680 41. Zhou, P., Resendez, S.L., Rodriguez-Romaguera, J., Jimenez, J.C., Neufeld, S.Q.,  
681 Giovannucci, A., Friedrich, J., Pnevmatikakis, E.A., Stuber, G.D., Hen, R., et al. (2018).  
682 Efficient and accurate extraction of in vivo calcium signals from microendoscopic video  
683 data. *Elife* *7*.
- 684
